# Supplementary material
Source: publisher figshare collection journal article supplement (https://tandf.figshare.com/ndownloader/files/22430760)
Supplement: Supplementary file 1 [file 22430760]

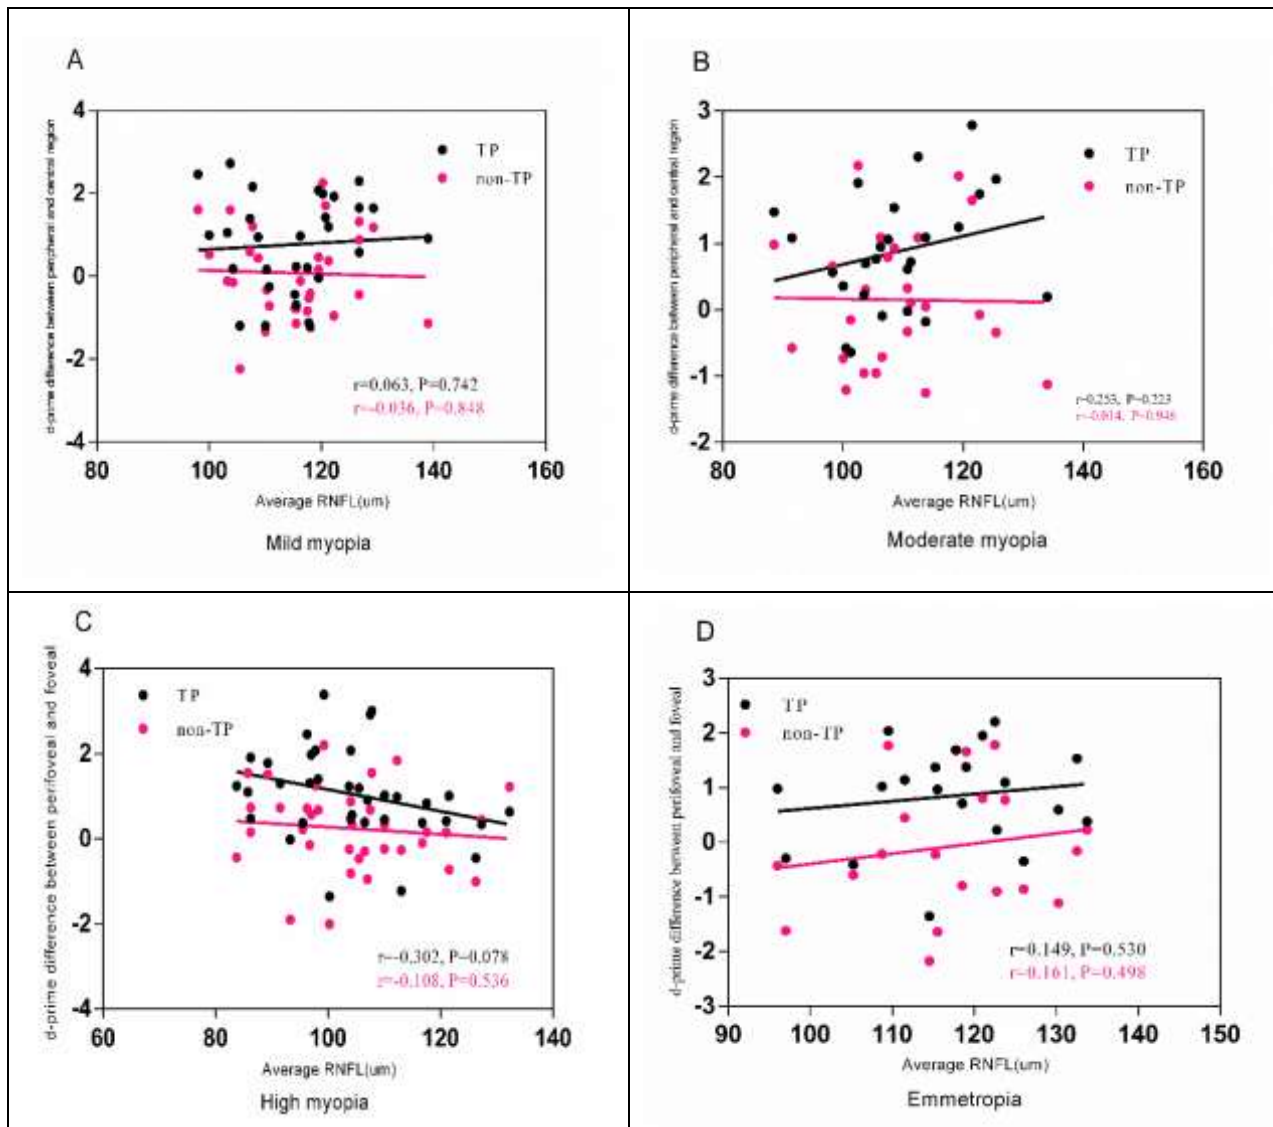

Supplemental Figure 1. Correlation between peripheral TP/non-TP deficit (peripheral TP/non-TP d-prime minus that of central region) and average peripapillary RNFL thickness.

A: mild myopia group; B: moderate myopia group; C: high myopia group; D: emmetropia group.
